# Supplementary material for: Education, night splinting and exercise versus usual care on recovery and conversion to surgery for people awaiting carpal tunnel surgery: a protocol for a randomised controlled trial
Source: PubMed Central journal article supplement — BMJ Open. 2016 Sep 21;6(9):e012053. doi: 10.1136/bmjopen-2016-012053 (PMC5051399; doi:10.1136/bmjopen-2016-012053), 2016-09-21
Supplement: bmjopen-2016-012053supp_appendix.pdf [file bmjopen-2016-012053supp_appendix.pdf]

**1) In the past week, how satisfied are you in your ability to use your right hand?**

|                     |   |   |   |                                     |   |   |   |   |                   |
|---------------------|---|---|---|-------------------------------------|---|---|---|---|-------------------|
| 1                   | 2 | 3 | 4 | 5                                   | 6 | 7 | 8 | 9 | 10                |
| Very<br>unsatisfied |   |   |   | Neither satisfied<br>or unsatisfied |   |   |   |   | Very<br>satisfied |

**2) In the past 6 weeks, how satisfied are you with the changes (if any) to the symptoms in right hand?**

|                     |   |   |   |                                     |   |   |   |   |                   |
|---------------------|---|---|---|-------------------------------------|---|---|---|---|-------------------|
| 1                   | 2 | 3 | 4 | 5                                   | 6 | 7 | 8 | 9 | 10                |
| Very<br>unsatisfied |   |   |   | Neither satisfied<br>or unsatisfied |   |   |   |   | Very<br>satisfied |

**3) I believe attending QEII Hospital for these appointments has been beneficial to my condition:**

|                      |   |   |   |                              |   |   |   |   |                   |
|----------------------|---|---|---|------------------------------|---|---|---|---|-------------------|
| 1                    | 2 | 3 | 4 | 5                            | 6 | 7 | 8 | 9 | 10                |
| Strongly<br>disagree |   |   |   | Neither agree<br>or disagree |   |   |   |   | Strongly<br>agree |

**4) I feel less frustrated waiting for a medical consultation since the CTS treatment started:**

|                      |   |   |   |                              |   |   |   |   |                   |
|----------------------|---|---|---|------------------------------|---|---|---|---|-------------------|
| 1                    | 2 | 3 | 4 | 5                            | 6 | 7 | 8 | 9 | 10                |
| Strongly<br>disagree |   |   |   | Neither agree<br>or disagree |   |   |   |   | Strongly<br>agree |

**5) I feel less anxious waiting for a medical consultation since the CTS treatment started:**

|                      |   |   |   |                              |   |   |   |   |                   |
|----------------------|---|---|---|------------------------------|---|---|---|---|-------------------|
| 1                    | 2 | 3 | 4 | 5                            | 6 | 7 | 8 | 9 | 10                |
| Strongly<br>disagree |   |   |   | Neither agree<br>or disagree |   |   |   |   | Strongly<br>agree |

**6) I have confidence in managing my CTS symptoms now:**

|                      |   |   |   |                              |   |   |   |   |                   |
|----------------------|---|---|---|------------------------------|---|---|---|---|-------------------|
| 1                    | 2 | 3 | 4 | 5                            | 6 | 7 | 8 | 9 | 10                |
| Strongly<br>disagree |   |   |   | Neither agree<br>or disagree |   |   |   |   | Strongly<br>agree |

**7) How satisfied are you with the treatment you received?**

|                     |   |   |   |                                     |   |   |   |   |                   |
|---------------------|---|---|---|-------------------------------------|---|---|---|---|-------------------|
| 1                   | 2 | 3 | 4 | 5                                   | 6 | 7 | 8 | 9 | 10                |
| Very<br>unsatisfied |   |   |   | Neither satisfied<br>or unsatisfied |   |   |   |   | Very<br>satisfied |
